# Supplementary material
Source: MDPI journal article supplement (https://www.mdpi.com/2072-4292/14/17/4386)
Supplement: s1 [file s1]

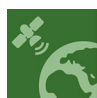

Table S1: The full list of FIA species groups in the eastern U.S.

| FIA Species Groups |                                 |
|--------------------|---------------------------------|
| Code               | Softwood                        |
| 1                  | Longleaf and slash pines        |
| 2                  | Loblolly and shortleaf pines    |
| 3                  | Other yellow pines              |
| 4                  | Eastern white and red pines     |
| 5                  | Jack pine                       |
| 6                  | Spruce and balsam fir           |
| 7                  | Eastern hemlock                 |
| 8                  | Cypress                         |
| 9                  | Other eastern softwoods         |
| Code               | Hardwood                        |
| 25                 | Select white oaks               |
| 26                 | Select red oaks                 |
| 27                 | Other white oaks                |
| 28                 | Other red oaks                  |
| 29                 | Hickory Eastern                 |
| 30                 | Yellow birch                    |
| 31                 | Hard maple                      |
| 32                 | Soft maple                      |
| 33                 | Beech                           |
| 34                 | Sweetgum                        |
| 35                 | Tupelo and blackgum             |
| 36                 | Ash                             |
| 37                 | Cottonwood and aspen            |
| 38                 | Basswood                        |
| 39                 | Yellow-poplar                   |
| 40                 | Black walnut                    |
| 41                 | Other eastern soft hardwoods    |
| 42                 | Other eastern hard hardwoods    |
| 43                 | Eastern noncommercial hardwoods |

Species groups are defined in (Burrill et al., 2018)

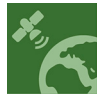

Table S2: Total forest volume and Volume/area estimates by each species group and survey unit. Only species groups with statistically significant models (i.e., standard errors  $\leq$  20%) are shown. Gray shading indicates the NAIP strata maps with the highest gains in efficiency relative to the stratified estimates based on tree canopy cover data.

## Tennessee

| UNIT    | Species group                    | Plot<br>S | SPGRPC<br>D | TN - Total Volume |                   |                      |      | Plot<br>gain/loss | TN - Vol/Area    |                   |                      |      | Plot<br>gain/loss |
|---------|----------------------------------|-----------|-------------|-------------------|-------------------|----------------------|------|-------------------|------------------|-------------------|----------------------|------|-------------------|
|         |                                  |           |             | PS <sub>DS</sub>  | PS <sub>SCH</sub> | PS <sub>SCHM+F</sub> | Diff |                   | PS <sub>DS</sub> | PS <sub>SCH</sub> | PS <sub>SCHM+F</sub> | Diff |                   |
|         |                                  |           |             | M                 | M                 | T                    |      |                   | M                | M                 | T                    |      |                   |
| Central | Other eastern softwoods          | 216       | 9           | 1.05              | 1.14              | 1.64                 | 0.64 | 138               | 1.16             | 1.17              | 1.72                 | 0.72 | 155               |
| Central | Select white oaks                | 253       | 25          | 1.05              | 1.09              | 1.02                 | 0.09 | 24                | 1.08             | 1.08              | 1.04                 | 0.08 | 20                |
| Central | Select red oaks                  | 99        | 26          | 0.97              | 1.00              | 1.02                 | 0.02 | 2                 | 1.00             | 1.00              | 1.05                 | 0.05 | 5                 |
| Central | Other white oaks                 | 82        | 27          | 0.97              | 0.99              | 1.01                 | 0.01 | 1                 | 1.01             | 0.99              | 1.03                 | 0.03 | 3                 |
| Central | Other red oaks                   | 137       | 28          | 1.03              | 1.06              | 1.03                 | 0.06 | 9                 | 1.06             | 1.07              | 1.06                 | 0.07 | 9                 |
| Central | Hickory                          | 301       | 29          | 1.04              | 1.05              | 1.09                 | 0.09 | 26                | 1.06             | 1.05              | 1.09                 | 0.09 | 28                |
| Central | Hard maple                       | 222       | 31          | 1.04              | 1.04              | 1.04                 | 0.04 | 10                | 1.06             | 1.05              | 1.05                 | 0.06 | 14                |
|         |                                  |           |             |                   |                   |                      | -    |                   |                  |                   |                      |      |                   |
| Central | Soft maple                       | 80        | 32          | 0.94              | 0.97              | 0.97                 | 0.03 | -2                | 0.98             | 0.98              | 1.00                 | 0.00 | 0                 |
| Central | Beech                            | 107       | 33          | 1.10              | 1.12              | 1.13                 | 0.13 | 14                | 1.13             | 1.12              | 1.14                 | 0.14 | 15                |
| Central | Sweetgum                         | 56        | 34          | 0.99              | 1.01              | 1.03                 | 0.03 | 2                 | 1.02             | 1.02              | 1.05                 | 0.05 | 3                 |
| Central | Tupelo and blackgum              | 94        | 35          | 1.01              | 1.04              | 1.00                 | 0.04 | 3                 | 1.05             | 1.04              | 1.02                 | 0.05 | 4                 |
|         |                                  |           |             |                   |                   |                      | -    |                   |                  |                   |                      |      |                   |
| Central | Ash                              | 228       | 36          | 0.97              | 0.98              | 0.98                 | 0.02 | -4                | 1.03             | 1.00              | 1.01                 | 0.03 | 6                 |
| Central | Yellow-poplar                    | 180       | 39          | 1.14              | 1.16              | 1.17                 | 0.17 | 30                | 1.17             | 1.17              | 1.20                 | 0.20 | 36                |
|         |                                  |           |             |                   |                   |                      | -    |                   |                  |                   |                      |      |                   |
| Central | Black walnut                     | 133       | 40          | 0.94              | 0.96              | 0.99                 | 0.01 | -2                | 0.99             | 0.98              | 1.02                 | 0.02 | 2                 |
| Central | Other eastern soft hardwoods     | 418       | 41          | 0.94              | 0.95              | 1.01                 | 0.01 | 4                 | 0.98             | 0.96              | 1.03                 | 0.03 | 11                |
| Central | Other eastern hard hardwoods     | 167       | 42          | 0.96              | 0.99              | 1.00                 | 0.00 | -1                | 1.00             | 1.00              | 1.02                 | 0.02 | 3                 |
|         |                                  |           |             |                   |                   |                      | -    |                   |                  |                   |                      |      |                   |
| Central | Eastern noncommercial hard-woods | 232       | 43          | 0.96              | 0.99              | 0.98                 | 0.01 | -2                | 1.01             | 1.01              | 1.01                 | 0.01 | 3                 |
| East    | Loblolly and shortleaf pines     | 122       | 2           | 0.99              | 1.00              | 1.05                 | 0.05 | 6                 | 1.05             | 1.02              | 1.08                 | 0.08 | 10                |
| East    | Other yellow pines               | 216       | 3           | 0.96              | 0.97              | 1.09                 | 0.09 | 20                | 1.03             | 1.01              | 1.13                 | 0.13 | 27                |
| East    | Eastern white and red pines      | 113       | 4           | 0.95              | 0.97              | 1.04                 | 0.04 | 5                 | 1.00             | 0.98              | 1.06                 | 0.06 | 7                 |

| UNIT    | Species group                    | Plot<br>s | SPGRPC<br>D | TN - Total Volume |                  |                     |      |                   | TN - Vol/Area    |                  |                     |      |                   |
|---------|----------------------------------|-----------|-------------|-------------------|------------------|---------------------|------|-------------------|------------------|------------------|---------------------|------|-------------------|
|         |                                  |           |             | PS <sub>DS</sub>  | PS <sub>CH</sub> | PS <sub>CHM+F</sub> | Diff | Plot<br>gain/loss | PS <sub>DS</sub> | PS <sub>CH</sub> | PS <sub>CHM+F</sub> | Diff | Plot<br>gain/loss |
|         |                                  |           |             | M                 | M                | T                   |      |                   | M                | M                | T                   |      |                   |
| East    | Other eastern softwoods          | 120       | 9           | 0.99              | 0.99             | 1.03                | 0.03 | 4                 | 1.04             | 1.01             | 1.05                | 0.05 | 6                 |
| East    | Select white oaks                | 265       | 25          | 1.02              | 1.02             | 1.01                | 0.02 | 5                 | 1.06             | 1.04             | 1.03                | 0.06 | 16                |
| East    | Select red oaks                  | 182       | 26          | 0.97              | 0.98             | 1.03                | 0.03 | 6                 | 1.01             | 1.00             | 1.05                | 0.05 | 10                |
| East    | Other white oaks                 | 325       | 27          | 1.00              | 1.01             | 1.02                | 0.02 | 6                 | 1.06             | 1.03             | 1.03                | 0.06 | 19                |
| East    | Hickory                          | 347       | 29          | 1.01              | 1.03             | 1.07                | 0.07 | 25                | 1.05             | 1.04             | 1.10                | 0.10 | 35                |
| East    | Hard maple                       | 145       | 31          | 0.95              | 0.97             | 1.01                | 0.01 | 2                 | 1.00             | 0.98             | 1.03                | 0.03 | 4                 |
| East    | Soft maple                       | 367       | 32          | 1.01              | 1.03             | 1.07                | 0.07 | 24                | 1.05             | 1.03             | 1.07                | 0.07 | 27                |
| East    | Beech                            | 99        | 33          | 1.01              | 1.02             | 1.00                | 0.02 | 2                 | 1.05             | 1.02             | 1.01                | 0.05 | 5                 |
| East    | Sweetgum                         | 79        | 34          | 1.09              | 1.11             | 0.98                | 0.11 | 9                 | 1.13             | 1.12             | 0.99                | 0.13 | 11                |
| East    | Tupelo and blackgum              | 223       | 35          | 1.00              | 1.01             | 0.98                | 0.01 | 3                 | 1.05             | 1.03             | 0.99                | 0.05 | 11                |
| East    | Ash                              | 105       | 36          | 0.96              | 0.97             | 1.01                | 0.01 | 1                 | 1.00             | 0.97             | 1.02                | 0.02 | 2                 |
| East    | Yellow-poplar                    | 340       | 39          | 1.13              | 1.14             | 1.10                | 0.14 | 48                | 1.16             | 1.14             | 1.11                | 0.16 | 53                |
| East    | Black walnut                     | 62        | 40          | 0.99              | 1.00             | 0.98                | 0.00 | 0                 | 1.04             | 1.01             | 1.00                | 0.04 | 2                 |
| East    | Other eastern soft hardwoods     | 374       | 41          | 1.02              | 1.04             | 1.02                | 0.04 | 15                | 1.05             | 1.03             | 1.03                | 0.05 | 19                |
| East    | Other eastern hard hardwoods     | 212       | 42          | 0.96              | 0.97             | 1.10                | 0.10 | 21                | 1.01             | 0.98             | 1.12                | 0.12 | 25                |
| East    | Eastern noncommercial hard-woods | 363       | 43          | 0.96              | 0.96             | 0.99                | 0.01 | -4                | 1.01             | 0.98             | 1.00                | 0.01 | 4                 |
| Plateau | Loblolly and shortleaf pines     | 77        | 2           | 1.05              | 1.06             | 1.25                | 0.25 | 19                | 1.07             | 1.06             | 1.25                | 0.25 | 19                |
| Plateau | Other yellow pines               | 115       | 3           | 1.01              | 1.02             | 1.04                | 0.04 | 5                 | 1.03             | 1.02             | 1.04                | 0.04 | 4                 |
| Plateau | Select white oaks                | 319       | 25          | 1.03              | 1.04             | 1.02                | 0.04 | 13                | 1.05             | 1.03             | 1.02                | 0.05 | 15                |
| Plateau | Select red oaks                  | 87        | 26          | 0.99              | 1.00             | 1.01                | 0.01 | 1                 | 0.99             | 0.98             | 1.00                | 0.00 | 0                 |
| Plateau | Other white oaks                 | 231       | 27          | 0.97              | 0.99             | 0.99                | 0.01 | -2                | 0.99             | 0.98             | 0.98                | 0.01 | -2                |
| Plateau | Other red oaks                   | 255       | 28          | 1.04              | 1.06             | 1.01                | 0.06 | 14                | 1.05             | 1.03             | 1.00                | 0.05 | 13                |
| Plateau | Hickory                          | 282       | 29          | 1.07              | 1.09             | 1.10                | 0.10 | 29                | 1.08             | 1.07             | 1.08                | 0.08 | 23                |
| Plateau | Hard maple                       | 144       | 31          | 1.03              | 1.04             | 1.05                | 0.05 | 7                 | 1.04             | 1.03             | 1.03                | 0.04 | 5                 |
| Plateau | Soft maple                       | 342       | 32          | 1.01              | 1.03             | 0.97                | 0.03 | 11                | 1.03             | 1.01             | 0.97                | 0.03 | 9                 |
| Plateau | Beech                            | 60        | 33          | 0.97              | 0.98             | 0.99                | 0.01 | -1                | 0.98             | 0.97             | 0.98                | 0.02 | -1                |

|              |                                  |     |    |      |      |      |      |    |      |      |      |      |    |
|--------------|----------------------------------|-----|----|------|------|------|------|----|------|------|------|------|----|
| Plateau      | Tupelo and blackgum              | 180 | 35 | 0.96 | 0.96 | 1.01 | 0.01 | 3  | 0.97 | 0.95 | 1.00 | 0.00 | 0  |
| Plateau      | Ash                              | 93  | 36 | 1.00 | 1.01 | 1.00 | 0.01 | 1  | 1.01 | 0.99 | 0.99 | 0.01 | 1  |
| Plateau      | Yellow-poplar                    | 282 | 39 | 1.06 | 1.06 | 1.08 | 0.08 | 23 | 1.05 | 1.04 | 1.06 | 0.06 | 17 |
|              |                                  |     |    |      |      |      | -    |    |      |      |      | -    |    |
| Plateau      | Other eastern soft hardwoods     | 237 | 41 | 0.98 | 0.99 | 0.98 | 0.01 | -3 | 0.99 | 0.99 | 0.97 | 0.01 | -3 |
|              |                                  |     |    |      |      |      | -    |    |      |      |      | -    |    |
| Plateau      | Other eastern hard hardwoods     | 105 | 42 | 0.94 | 0.95 | 0.98 | 0.02 | -3 | 0.95 | 0.94 | 0.97 | 0.03 | -3 |
|              |                                  |     |    |      |      |      | -    |    |      |      |      | -    |    |
| Plateau      | Eastern noncommercial hard-woods | 299 | 43 | 0.97 | 0.98 | 0.97 | 0.02 | -6 | 0.98 | 0.97 | 0.98 | 0.02 | -6 |
| West         | Loblolly and shortleaf pines     | 127 | 2  | 0.91 | 0.94 | 1.50 | 0.50 | 64 | 0.95 | 0.96 | 1.56 | 0.56 | 71 |
|              |                                  |     |    |      |      |      | -    |    |      |      |      | -    |    |
| West         | Other eastern softwoods          | 105 | 9  | 0.94 | 0.94 | 0.98 | 0.02 | -2 | 0.97 | 0.96 | 1.02 | 0.02 | 2  |
| West         | Select white oaks                | 151 | 25 | 0.95 | 0.98 | 1.01 | 0.01 | 2  | 0.98 | 0.99 | 1.06 | 0.06 | 9  |
|              |                                  |     |    |      |      |      | -    |    |      |      |      | -    |    |
| West         | Select red oaks                  | 98  | 26 | 0.97 | 0.98 | 0.96 | 0.02 | -2 | 0.99 | 1.01 | 1.00 | 0.01 | 1  |
|              |                                  |     |    |      |      |      | -    |    |      |      |      | -    |    |
| West         | Other white oaks                 | 86  | 27 | 0.91 | 0.93 | 0.92 | 0.07 | -6 | 0.94 | 0.95 | 0.96 | 0.04 | -3 |
| West         | Other red oaks                   | 188 | 28 | 1.14 | 1.18 | 0.91 | 0.18 | 34 | 1.16 | 1.19 | 0.94 | 0.19 | 37 |
|              |                                  |     |    |      |      |      | -    |    |      |      |      | -    |    |
| West         | Hickory                          | 166 | 29 | 0.96 | 0.98 | 0.94 | 0.02 | -3 | 0.98 | 1.00 | 0.97 | 0.00 | 0  |
| West         | Soft maple                       | 170 | 32 | 0.98 | 1.01 | 1.04 | 0.04 | 8  | 1.00 | 1.01 | 1.08 | 0.08 | 13 |
| West         | Sweetgum                         | 265 | 34 | 1.07 | 1.05 | 0.99 | 0.07 | 18 | 1.10 | 1.10 | 1.03 | 0.10 | 27 |
| West         | Ash                              | 104 | 36 | 0.99 | 1.01 | 1.07 | 0.07 | 8  | 1.01 | 1.03 | 1.11 | 0.11 | 12 |
| West         | Yellow-poplar                    | 142 | 39 | 1.01 | 1.05 | 0.98 | 0.05 | 7  | 1.03 | 1.07 | 1.03 | 0.07 | 11 |
| West         | Other eastern soft hardwoods     | 349 | 41 | 0.95 | 0.95 | 1.00 | 0.00 | -1 | 0.99 | 0.99 | 1.05 | 0.05 | 19 |
|              |                                  |     |    |      |      |      | -    |    |      |      |      | -    |    |
| West         | Other eastern hard hardwoods     | 92  | 42 | 0.96 | 0.97 | 0.93 | 0.03 | -3 | 0.98 | 0.98 | 0.96 | 0.02 | -2 |
|              |                                  |     |    |      |      |      | -    |    |      |      |      | -    |    |
| West         | Eastern noncommercial hard-woods | 89  | 43 | 0.97 | 1.00 | 0.91 | 0.00 | 0  | 1.00 | 1.01 | 0.95 | 0.01 | 1  |
| West Central | Loblolly and shortleaf pines     | 93  | 2  | 0.98 | 1.00 | 1.19 | 0.19 | 18 | 1.02 | 0.99 | 1.22 | 0.22 | 21 |
| West Central | Select white oaks                | 268 | 25 | 1.10 | 1.13 | 1.13 | 0.13 | 36 | 1.15 | 1.11 | 1.17 | 0.17 | 44 |

|              |                                 |     |    |      |      |      |      |    |      |      |      |      |    |
|--------------|---------------------------------|-----|----|------|------|------|------|----|------|------|------|------|----|
| West Central | Select red oaks                 | 67  | 26 | 1.11 | 1.11 | 1.05 | 0.11 | 8  | 1.16 | 1.09 | 1.08 | 0.16 | 11 |
| West Central | Other white oaks                | 168 | 27 | 0.96 | 0.99 | 0.95 | -    | -1 | 1.00 | 0.98 | 0.97 | 0.00 | 0  |
| West Central | Other red oaks                  | 155 | 28 | 0.95 | 0.96 | 1.02 | 0.02 | 3  | 1.00 | 0.96 | 1.05 | 0.05 | 8  |
| West Central | Hickory                         | 232 | 29 | 0.98 | 1.02 | 1.05 | 0.05 | 11 | 1.03 | 1.01 | 1.08 | 0.08 | 19 |
| West Central | Hard maple                      | 125 | 31 | 1.03 | 1.05 | 1.05 | 0.05 | 7  | 1.05 | 1.03 | 1.07 | 0.07 | 9  |
| West Central | Soft maple                      | 101 | 32 | 0.95 | 0.99 | 0.97 | -    | -1 | 0.99 | 0.97 | 0.99 | 0.01 | -1 |
| West Central | Beech                           | 90  | 33 | 1.04 | 1.06 | 1.11 | 0.11 | 10 | 1.07 | 1.03 | 1.13 | 0.13 | 12 |
| West Central | Sweetgum                        | 142 | 34 | 1.09 | 1.09 | 1.04 | 0.09 | 13 | 1.12 | 1.07 | 1.06 | 0.12 | 17 |
| West Central | Tupelo and blackgum             | 133 | 35 | 0.94 | 0.97 | 1.03 | 0.03 | 4  | 0.99 | 0.95 | 1.06 | 0.06 | 8  |
| West Central | Ash                             | 83  | 36 | 1.02 | 1.03 | 1.08 | 0.08 | 6  | 1.05 | 1.01 | 1.09 | 0.09 | 8  |
| West Central | Yellow-poplar                   | 181 | 39 | 0.96 | 0.97 | 1.04 | 0.04 | 7  | 0.99 | 0.96 | 1.07 | 0.07 | 13 |
| West Central | Other eastern soft hardwoods    | 218 | 41 | 1.01 | 0.96 | 1.10 | 0.10 | 23 | 1.02 | 0.96 | 1.11 | 0.11 | 24 |
| West Central | Other eastern hard hardwoods    | 55  | 42 | 0.99 | 1.01 | 1.04 | 0.04 | 2  | 1.02 | 0.99 | 1.06 | 0.06 | 3  |
| West Central | Eastern noncommercial hardwoods | 191 | 43 | 0.97 | 1.00 | 1.02 | 0.02 | 4  | 1.01 | 0.99 | 1.04 | 0.04 | 7  |

SPGRPCD: Species group code.

Virginia

| UNIT | Species group | Plot<br>s | SPGRPC<br>D | Total Volume     |                  |                    |      | Plot<br>gain/loss | Volume/Area      |                  |                    |      | Plot<br>gain/loss |
|------|---------------|-----------|-------------|------------------|------------------|--------------------|------|-------------------|------------------|------------------|--------------------|------|-------------------|
|      |               |           |             | PS <sub>DS</sub> | PS <sub>CH</sub> | PS <sub>CHM+</sub> | Diff |                   | PS <sub>DS</sub> | PS <sub>CH</sub> | PS <sub>CHM+</sub> | Diff |                   |
|      |               |           |             | M                | M                | FT                 |      |                   | M                | M                | FT                 |      |                   |

|                |                              |     |    |      |      |      |      |        |      |      |      |      |     |
|----------------|------------------------------|-----|----|------|------|------|------|--------|------|------|------|------|-----|
| Coastal Plain  | Loblolly and shortleaf pines | 495 | 2  | 0.89 | 0.92 | 1.13 | 0.13 | 66.35  | 0.99 | 0.99 | 1.18 | 0.18 | 91  |
|                |                              |     |    |      |      |      | -    |        |      |      |      | -    |     |
| Coastal Plain  | Other yellow pines           | 86  | 3  | 0.92 | 0.94 | 0.91 | 0.06 | -4.82  | 0.98 | 0.97 | 0.91 | 0.02 | -2  |
| Coastal Plain  | Other eastern softwoods      | 57  | 9  | 1.03 | 1.03 | 1.04 | 0.04 | 2.03   | 1.09 | 1.07 | 1.04 | 0.09 | 5   |
| Coastal Plain  | Select white oaks            | 270 | 25 | 1.01 | 1.01 | 1.07 | 0.07 | 18.16  | 1.07 | 1.05 | 1.07 | 0.07 | 19  |
| Coastal Plain  | Select red oaks              | 82  | 26 | 0.98 | 0.99 | 1.00 | 0.00 | -0.21  | 1.04 | 1.02 | 1.01 | 0.04 | 3   |
| Coastal Plain  | Other red oaks               | 335 | 28 | 0.97 | 0.98 | 1.01 | 0.01 | 2.42   | 1.02 | 1.01 | 1.01 | 0.02 | 7   |
| Coastal Plain  | Hickory                      | 153 | 29 | 1.00 | 1.00 | 1.07 | 0.07 | 10.28  | 1.06 | 1.03 | 1.08 | 0.08 | 12  |
| Coastal Plain  | Soft maple                   | 354 | 32 | 0.95 | 0.96 | 1.17 | 0.17 | 58.90  | 1.02 | 1.01 | 1.18 | 0.18 | 64  |
| Coastal Plain  | Beech                        | 139 | 33 | 0.95 | 0.96 | 1.03 | 0.03 | 3.92   | 1.01 | 0.99 | 1.03 | 0.03 | 5   |
| Coastal Plain  | Sweetgum                     | 430 | 34 | 1.12 | 1.09 | 1.12 | 0.12 | 53.63  | 1.17 | 1.15 | 1.13 | 0.17 | 75  |
| Coastal Plain  | Tupelo and blackgum          | 187 | 35 | 0.98 | 1.01 | 1.14 | 0.14 | 26.14  | 1.04 | 1.04 | 1.15 | 0.15 | 27  |
| Coastal Plain  | Yellow-poplar                | 345 | 39 | 1.16 | 1.10 | 1.18 | 0.18 | 60.85  | 1.20 | 1.15 | 1.17 | 0.20 | 69  |
| Coastal Plain  | Other eastern soft hardwoods | 204 | 41 | 1.00 | 1.00 | 0.92 | 0.00 | 0.87   | 1.06 | 1.03 | 0.92 | 0.06 | 13  |
| Coastal Plain  | Other eastern hard hard-     |     |    |      |      |      |      |        |      |      |      |      |     |
| Coastal Plain  | woods                        | 241 | 42 | 0.95 | 0.96 | 1.01 | 0.01 | 3.28   | 1.00 | 0.99 | 1.02 | 0.02 | 5   |
| Coastal Plain  | Eastern noncommercial hard-  |     |    |      |      |      |      |        |      |      |      |      |     |
| Coastal Plain  | woods                        | 122 | 43 | 1.00 | 0.98 | 1.02 | 0.02 | 2.40   | 1.04 | 1.01 | 1.02 | 0.04 | 5   |
| Northern Moun- |                              |     |    |      |      |      |      |        |      |      |      |      |     |
| tain           | Other yellow pines           | 182 | 3  | 0.99 | 0.99 | 1.19 | 0.19 | 34.14  | 1.00 | 1.00 | 1.23 | 0.23 | 42  |
| Northern Moun- |                              |     |    |      |      |      |      |        |      |      |      |      |     |
| tain           | Eastern white and red pines  | 142 | 4  | 1.11 | 1.10 | 1.52 | 0.52 | 73.50  | 1.11 | 1.12 | 1.60 | 0.60 | 85  |
| Northern Moun- |                              |     |    |      |      |      |      |        |      |      |      |      |     |
| tain           | Select white oaks            | 208 | 25 | 1.02 | 1.05 | 0.98 | 0.05 | 10.64  | 1.06 | 1.08 | 1.02 | 0.08 | 18  |
| Northern Moun- |                              |     |    |      |      |      |      |        |      |      |      |      |     |
| tain           | Select red oaks              | 192 | 26 | 1.10 | 1.11 | 1.07 | 0.11 | 20.34  | 1.12 | 1.13 | 1.11 | 0.13 | 25  |
| Northern Moun- |                              |     |    |      |      |      |      |        |      |      |      |      |     |
| tain           | Other white oaks             | 332 | 27 | 0.90 | 0.94 | 0.90 | 0.06 | -20.44 | 0.96 | 0.96 | 0.97 | 0.03 | -11 |

|                         |                                      |     |    |      |      |      |      |        |      |      |      |      |    |
|-------------------------|--------------------------------------|-----|----|------|------|------|------|--------|------|------|------|------|----|
| Northern Moun-<br>tains | Other red oaks                       | 260 | 28 | 0.98 | 1.01 | 0.97 | 0.01 | 2.07   | 1.04 | 1.05 | 1.03 | 0.05 | 12 |
| Northern Moun-<br>tains | Hickory                              | 218 | 29 | 1.05 | 1.06 | 1.08 | 0.08 | 17.35  | 1.08 | 1.09 | 1.11 | 0.11 | 25 |
| Northern Moun-<br>tains | Soft maple                           | 284 | 32 | 1.03 | 1.06 | 1.04 | 0.06 | 18.28  | 1.05 | 1.09 | 1.07 | 0.09 | 27 |
| Northern Moun-<br>tains | Tupelo and blackgum                  | 197 | 35 | 0.93 | 0.94 | 0.90 | 0.06 | -12.47 | 0.96 | 0.96 | 0.94 | 0.04 | -7 |
| Northern Moun-<br>tains | Ash                                  | 73  | 36 | 1.00 | 0.99 | 0.99 | 0.00 | 0.04   | 1.01 | 1.01 | 1.01 | 0.01 | 1  |
| Northern Moun-<br>tains | Yellow-poplar                        | 124 | 39 | 1.15 | 1.13 | 1.10 | 0.15 | 18.11  | 1.15 | 1.14 | 1.13 | 0.15 | 19 |
| Northern Moun-<br>tains | Other eastern soft hardwoods         | 147 | 41 | 1.05 | 1.04 | 1.06 | 0.06 | 8.52   | 1.04 | 1.03 | 1.06 | 0.06 | 9  |
| Northern Moun-<br>tains | Other eastern hard hard-<br>woods    | 130 | 42 | 1.00 | 0.98 | 1.00 | 0.00 | -0.39  | 1.00 | 1.01 | 1.02 | 0.02 | 3  |
| Northern Moun-<br>tains | Eastern noncommercial hard-<br>woods | 145 | 43 | 0.96 | 0.94 | 0.95 | 0.04 | -5.40  | 0.97 | 0.95 | 0.98 | 0.02 | -3 |
| Northern Pied-<br>mont  | Loblolly and shortleaf pines         | 93  | 2  | 0.93 | 0.96 | 0.87 | 0.04 | -4.02  | 1.04 | 1.06 | 0.96 | 0.06 | 5  |
| Northern Pied-<br>mont  | Other yellow pines                   | 149 | 3  | 0.93 | 0.94 | 1.01 | 0.01 | 1.67   | 1.03 | 1.04 | 1.09 | 0.09 | 14 |
| Northern Pied-<br>mont  | Other eastern softwoods              | 92  | 9  | 0.95 | 0.95 | 0.91 | 0.05 | -4.58  | 1.04 | 1.04 | 0.98 | 0.04 | 4  |
| Northern Pied-<br>mont  | Select white oaks                    | 209 | 25 | 1.06 | 1.07 | 1.00 | 0.07 | 13.87  | 1.12 | 1.15 | 1.08 | 0.15 | 32 |
| Northern Pied-<br>mont  | Select red oaks                      | 132 | 26 | 0.94 | 0.96 | 0.93 | 0.04 | -4.91  | 1.03 | 1.06 | 1.02 | 0.06 | 7  |

|                |                              |     |    |      |      |      |      |       |      |      |      |      |    |
|----------------|------------------------------|-----|----|------|------|------|------|-------|------|------|------|------|----|
| Northern Pied- |                              |     |    |      |      |      | -    |       |      |      |      |      |    |
| mont           | Other white oaks             | 129 | 27 | 0.93 | 0.93 | 0.92 | 0.07 | -9.46 | 1.03 | 1.02 | 1.00 | 0.03 | 4  |
| Northern Pied- |                              |     |    |      |      |      | -    |       |      |      |      |      |    |
| mont           | Other red oaks               | 187 | 28 | 0.98 | 0.98 | 0.93 | 0.02 | -3.03 | 1.05 | 1.05 | 0.99 | 0.05 | 10 |
| Northern Pied- |                              |     |    |      |      |      | -    |       |      |      |      |      |    |
| mont           | Hickory                      | 239 | 29 | 0.98 | 0.99 | 0.96 | 0.01 | -3.56 | 1.10 | 1.08 | 1.05 | 0.10 | 24 |
| Northern Pied- |                              |     |    |      |      |      | -    |       |      |      |      |      |    |
| mont           | Soft maple                   | 257 | 32 | 0.94 | 0.96 | 0.92 | 0.04 | -9.92 | 1.02 | 1.05 | 1.00 | 0.05 | 12 |
| Northern Pied- |                              |     |    |      |      |      | -    |       |      |      |      |      |    |
| mont           | Beech                        | 94  | 33 | 0.97 | 0.98 | 0.93 | 0.02 | -1.48 | 1.05 | 1.07 | 1.00 | 0.07 | 6  |
| Northern Pied- |                              |     |    |      |      |      | -    |       |      |      |      |      |    |
| mont           | Tupelo and blackgum          | 124 | 35 | 0.98 | 0.99 | 0.99 | 0.01 | -0.78 | 1.07 | 1.09 | 1.06 | 0.09 | 11 |
| Northern Pied- |                              |     |    |      |      |      | -    |       |      |      |      |      |    |
| mont           | Ash                          | 87  | 36 | 0.89 | 0.86 | 0.98 | 0.02 | -1.84 | 1.00 | 0.96 | 1.07 | 0.07 | 6  |
| Northern Pied- |                              |     |    |      |      |      |      |       |      |      |      |      |    |
| mont           | Yellow-poplar                | 291 | 39 | 1.14 | 1.11 | 1.13 | 0.14 | 42.05 | 1.29 | 1.24 | 1.22 | 0.29 | 84 |
| Northern Pied- |                              |     |    |      |      |      |      |       |      |      |      |      |    |
| mont           | Black walnut                 | 48  | 40 | 0.93 | 0.88 | 1.09 | 0.09 | 4.41  | 1.05 | 0.99 | 1.20 | 0.20 | 9  |
| Northern Pied- |                              |     |    |      |      |      |      |       |      |      |      |      |    |
| mont           | Other eastern soft hardwoods | 173 | 41 | 0.99 | 0.98 | 1.03 | 0.03 | 4.33  | 1.09 | 1.09 | 1.12 | 0.12 | 20 |
| Northern Pied- |                              |     |    |      |      |      | -    |       |      |      |      |      |    |
| mont           | Other eastern hard hard-     | 122 | 42 | 0.93 | 0.92 | 0.97 | 0.03 | -3.25 | 1.03 | 1.02 | 1.06 | 0.06 | 8  |
| Northern Pied- |                              |     |    |      |      |      | -    |       |      |      |      |      |    |
| mont           | Eastern noncommercial hard-  | 122 | 43 | 0.91 | 0.92 | 0.93 | 0.07 | -8.12 | 1.02 | 1.02 | 1.02 | 0.02 | 3  |
| Southern Moun- |                              |     |    |      |      |      | -    |       |      |      |      | -    |    |
| tains          | Other yellow pines           | 79  | 3  | 0.91 | 0.93 | 0.94 | 0.06 | -4.38 | 0.94 | 0.92 | 0.95 | 0.05 | -4 |
| Southern Moun- |                              |     |    |      |      |      |      |       |      |      |      |      |    |
| tains          | Eastern white and red pines  | 136 | 4  | 0.97 | 0.97 | 1.19 | 0.19 | 25.31 | 0.98 | 0.96 | 1.19 | 0.19 | 25 |



|                         |                                   |     |    |      |      |      |      |       |      |      |      |      |    |
|-------------------------|-----------------------------------|-----|----|------|------|------|------|-------|------|------|------|------|----|
| Southern Moun-<br>tains | Select white oaks                 | 182 | 25 | 1.03 | 1.04 | 1.02 | 0.04 | 7.33  | 1.05 | 1.02 | 1.01 | 0.05 | 9  |
| Southern Moun-<br>tains | Select red oaks                   | 185 | 26 | 1.03 | 1.04 | 1.06 | 0.06 | 11.83 | 1.04 | 1.02 | 1.05 | 0.05 | 9  |
| Southern Moun-<br>tains | Other white oaks                  | 239 | 27 | 0.94 | 0.96 | 0.98 | 0.02 | -4.53 | 0.97 | 0.95 | 0.97 | 0.03 | -7 |
| Southern Moun-<br>tains | Other red oaks                    | 218 | 28 | 0.96 | 0.98 | 0.99 | 0.01 | -3.18 | 1.00 | 0.97 | 0.99 | 0.00 | -1 |
| Southern Moun-<br>tains | Hickory                           | 267 | 29 | 1.01 | 1.03 | 1.04 | 0.04 | 9.77  | 1.04 | 1.02 | 1.03 | 0.04 | 12 |
| Southern Moun-<br>tains | Hard maple                        | 182 | 31 | 1.01 | 1.02 | 1.02 | 0.02 | 4.06  | 1.02 | 1.00 | 1.01 | 0.02 | 4  |
| Southern Moun-<br>tains | Soft maple                        | 377 | 32 | 1.04 | 1.05 | 1.00 | 0.05 | 20.16 | 1.05 | 1.03 | 0.99 | 0.05 | 19 |
| Southern Moun-<br>tains | Beech                             | 102 | 33 | 1.00 | 1.02 | 1.00 | 0.02 | 1.68  | 1.02 | 1.00 | 0.99 | 0.02 | 2  |
| Southern Moun-<br>tains | Tupelo and blackgum               | 140 | 35 | 0.97 | 0.99 | 0.98 | 0.01 | -1.28 | 0.99 | 0.97 | 0.97 | 0.01 | -1 |
| Southern Moun-<br>tains | Ash                               | 118 | 36 | 0.95 | 0.96 | 1.03 | 0.03 | 3.72  | 0.97 | 0.95 | 1.02 | 0.02 | 2  |
| Southern Moun-<br>tains | Basswood                          | 61  | 38 | 1.05 | 1.07 | 1.07 | 0.07 | 4.24  | 1.06 | 1.04 | 1.05 | 0.06 | 4  |
| Southern Moun-<br>tains | Yellow-poplar                     | 309 | 39 | 1.10 | 1.12 | 1.07 | 0.12 | 36.12 | 1.12 | 1.10 | 1.06 | 0.12 | 39 |
| Southern Moun-<br>tains | Other eastern soft hardwoods      | 313 | 41 | 0.95 | 0.97 | 0.99 | 0.01 | -3.90 | 0.98 | 0.96 | 0.97 | 0.02 | -5 |
| Southern Moun-<br>tains | Other eastern hard hard-<br>woods | 233 | 42 | 0.97 | 0.99 | 0.91 | 0.01 | -2.79 | 0.99 | 0.97 | 0.90 | 0.01 | -2 |

|                         |                                      |     |    |      |      |      |      |        |      |      |      |      |     |
|-------------------------|--------------------------------------|-----|----|------|------|------|------|--------|------|------|------|------|-----|
| Southern Moun-<br>tains | Eastern noncommercial hard-<br>woods | 303 | 43 | 0.99 | 1.00 | 1.03 | 0.03 | 7.86   | 1.01 | 0.99 | 1.01 | 0.01 | 4   |
| Southern Pied-<br>mont  | Loblolly and shortleaf pines         | 315 | 2  | 1.02 | 1.04 | 1.39 | 0.39 | 123.44 | 1.04 | 1.04 | 1.38 | 0.38 | 119 |
| Southern Pied-<br>mont  | Other yellow pines                   | 244 | 3  | 1.02 | 1.02 | 1.02 | 0.02 | 5.59   | 1.02 | 1.02 | 1.00 | 0.02 | 4   |
| Southern Pied-<br>mont  | Other eastern softwoods              | 122 | 9  | 1.02 | 1.03 | 0.97 | 0.03 | 3.42   | 1.03 | 1.02 | 0.95 | 0.03 | 4   |
| Southern Pied-<br>mont  | Select white oaks                    | 291 | 25 | 1.09 | 1.11 | 1.12 | 0.12 | 36.15  | 1.09 | 1.11 | 1.11 | 0.11 | 33  |
| Southern Pied-<br>mont  | Select red oaks                      | 120 | 26 | 1.07 | 1.09 | 1.12 | 0.12 | 14.58  | 1.08 | 1.08 | 1.11 | 0.11 | 13  |
| Southern Pied-<br>mont  | Other white oaks                     | 145 | 27 | 1.00 | 1.02 | 1.05 | 0.05 | 7.26   | 1.00 | 1.01 | 1.04 | 0.04 | 6   |
| Southern Pied-<br>mont  | Other red oaks                       | 278 | 28 | 1.07 | 1.09 | 1.01 | 0.09 | 24.94  | 1.06 | 1.07 | 0.99 | 0.07 | 21  |
| Southern Pied-<br>mont  | Hickory                              | 250 | 29 | 1.08 | 1.09 | 1.07 | 0.09 | 22.78  | 1.09 | 1.09 | 1.06 | 0.09 | 23  |
| Southern Pied-<br>mont  | Soft maple                           | 372 | 32 | 1.06 | 1.07 | 1.05 | 0.07 | 24.22  | 1.06 | 1.06 | 1.03 | 0.06 | 23  |
| Southern Pied-<br>mont  | Beech                                | 126 | 33 | 1.09 | 1.11 | 1.02 | 0.11 | 14.38  | 1.09 | 1.09 | 1.01 | 0.09 | 12  |
| Southern Pied-<br>mont  | Sweetgum                             | 226 | 34 | 1.04 | 1.04 | 1.02 | 0.04 | 8.95   | 1.05 | 1.05 | 1.01 | 0.05 | 10  |
| Southern Pied-<br>mont  | Tupelo and blackgum                  | 155 | 35 | 1.01 | 1.03 | 1.06 | 0.06 | 9.31   | 1.01 | 1.02 | 1.05 | 0.05 | 7   |
| Southern Pied-<br>mont  | Ash                                  | 84  | 36 | 0.99 | 1.00 | 0.87 | 0.00 | -0.12  | 1.00 | 0.99 | 0.86 | 0.00 | 0   |

|                |                              |     |    |      |      |      |      |        |      |      |      |      |     |
|----------------|------------------------------|-----|----|------|------|------|------|--------|------|------|------|------|-----|
| Southern Pied- |                              |     |    |      |      |      |      |        |      |      |      |      |     |
| mont           | Yellow-poplar                | 430 | 39 | 1.28 | 1.21 | 1.16 | 0.28 | 119.91 | 1.28 | 1.24 | 1.15 | 0.28 | 122 |
| Southern Pied- | Other eastern soft hardwoods | 275 | 41 | 1.06 | 1.04 | 1.07 | 0.07 | 18.41  | 1.06 | 1.04 | 1.05 | 0.06 | 16  |
| Southern Pied- | Other eastern hard hard-     |     |    |      |      |      |      |        |      |      |      |      |     |
| mont           | woods                        | 105 | 42 | 1.04 | 1.04 | 1.04 | 0.04 | 4.68   | 1.04 | 1.03 | 1.03 | 0.04 | 5   |
| Southern Pied- | Eastern noncommercial hard-  |     |    |      |      |      |      |        |      |      |      |      |     |
| mont           | woods                        | 260 | 43 | 1.05 | 1.06 | 1.13 | 0.13 | 34.84  | 1.05 | 1.05 | 1.12 | 0.12 | 32  |

SPGRPCD: FIA species group code
